# Supplementary material
Source: PubMed Central journal article supplement (PMC5367971)
Supplement: NIHMS839178-supplement-Supp_info.pdf [file NIHMS839178-supplement-Supp_info.pdf]

## **Supplemental Information**

### **Protein tyrosine phosphatase PRL2 mediates Notch and Kit signals in early T cell progenitors**

Michihiro Kobayashi, Sarah Nabinger, Yunpeng Bai, Momoko Yoshimoto, Rui Gao, Sisi Chen, Chonghua Yao, Yuanshu Dong, Lujuan Zhang, Sonia Rodriguez, Nadia Carlesso, Mervin C. Yoder, Reuben Kapur, Mark H. Kaplan, H Daniel Lacorazza, Zhong-Yin Zhang, and Yan Liu

## **Supplementary Methods**

### **Real-time PCR**

For quantitative reverse-transcription polymerase chain reaction (RT-PCR), total RNA was isolated using the RNeasy Plus Micro Kit (QIAGEN), and then subjected to reverse transcription with random hexamers (SuperScript III kit; Invitrogen). Quantitative real-time PCR was performed with SYBR Green (Qiagen) on an ABI PRISM 7500 system. Gene specific primers were designed to flank introns so that products from cDNA could be distinguished from possible genomic DNA contamination. Primer sequences are listed in Supplementary Table 3.

### **In vitro methylcellulose colony-forming cell assay**

Clonogenic progenitors were determined in methylcellulose medium (MethoCult GF M3234, StemCell Technologies) with cytokines (SCF, TPO, EPO, IL-3, and GM-CSF) using 500 ETPs per well (6-well plate). Colonies were scored after 7 days of the culture.

### **Apoptosis assays**

Thymocytes were harvested and cultured in the presence of IL-7 (5ng/ml) for 48hrs with or without 2Gy irradiation. Cell viability was evaluated by PI/Annexin V staining in combination with lineage markers, including CD25, CD44, and CD117.

### **Luciferase assay**

293 cells were transfected with human PRL2 promoter driven luciferase reporter plasmids containing either RBPJ binding sites or mutant RBPJ binding sites. Luciferase activity was assayed 24 hours after transfection according to the manufacturer's instructions (Promega).

## Supplementary Figure legends

**Figure S1.** (A) The frequency of CD4<sup>+</sup> and CD8<sup>+</sup> T cells as well as B220<sup>+</sup> B cells in the spleen of *Prl2*<sup>+/+</sup> and *Prl2*<sup>-/-</sup> mice were quantified by flow cytometry analysis. Data shown are the mean percentage ( $\pm$  SD) of cells in the spleen. No statistical difference was observed. (B) The frequency of DN1, ETP, DN2, DN3, and DN4 thymocytes in *Prl2*<sup>+/+</sup> and *Prl2*<sup>-/-</sup> mice were quantified by flow cytometry analysis. Frequencies of DN2a, DN2b, and DN3 cells are increased in *Prl2*<sup>-/-</sup> thymus compared to *Prl2*<sup>+/+</sup> thymus. \* $P < 0.05$ ,  $n = 7$ . (C) The frequency of B220<sup>+</sup> and Gr1/Mac1<sup>+</sup> cells within the CD4/CD8 DN thymocytes is shown (\*\* $P < 0.01$ ,  $n = 3$ ). (D) Quantitative real-time PCR analysis of DLL and SCF expression in stromal cells from *Prl2*<sup>+/+</sup> and *Prl2*<sup>-/-</sup> thymus. Data shown are the mean values  $\pm$  SD ( $n = 3$ ). (E) Flow cytometry analysis of bone marrow cells from 8 week-old *Prl2*<sup>+/+</sup> and *Prl2*<sup>-/-</sup> mice to identify hematopoietic stem and progenitor cells. Quantification of LT-HSCs, ST-HSCs, MPPs, LMPPs, CLPs, CMPs, GMPs and MEPs in *Prl2*<sup>-/-</sup> mice, presented relative to their abundance in *Prl2*<sup>+/+</sup> mice, set as 1. Definition of each cell population is shown in supplementary table 1.

**Figure S2.** (A) The absolute number of donor-derived cells in the thymus of recipient mice repopulated with *Prl2*<sup>+/+</sup> or *Prl2*<sup>-/-</sup> HSCs.

**Figure S3.** (A) The frequency of donor-derived ETPs, DN2, and DN4 cells in thymus was determined by flow cytometry analysis 18 weeks following HSC transplant. Representative flow cytometry plot is shown. (B) The frequency of donor-derived cells in the spleen was determined by flow cytometry analysis 18 weeks following HSC transplant. T cell recovery was significantly lower in recipients repopulated with *Prl2*<sup>-/-</sup> HSCs compared to that of the *Prl2*<sup>+/+</sup> cells. \*\*\* $P < 0.001$ ,  $n = 8$ .

**Figure S4.** (A) Representative flow cytometry plots of T cell cultures with different dose of SCF are shown. (B) The relationship between SCF dosage and T cell growth was evaluated in DLL1-Fc cultures. Total cell count is shown as fold increase at day 12.

**Figure S5.** (A) The structure of mouse and human PRL2 promoter regions is shown. RBPJ and Hes binding sites are indicated. (B) Notch1 directly binds to PRL2 (PTP4A2) in CUTLL1 cells revealed by genome-wide ChIP-seq analysis. Top two tracks are histone acetylation (H3K27ac) and BRD4 that shows active chromatin. Third track is Notch1 and last track is Notch1 when CUTLL1 cells were treated with Notch inhibitor, GSI. It clearly shows that intron 1 is active enhancer and Notch1 binding site is regulated by GSI (Notch signals). (C) The structure of wild type (WT) and mutant (MUT) human PRL2 reporter is shown. Mutation of the RBPJ-binding site is underlined.

**Figure S6.** (A) The structure of mouse and human c-Kit promoter regions is shown. RBPJ and Hes binding sites are indicated. (B) Thymus was harvested from RBPJ<sup>fl/fl</sup>-Cre<sup>-</sup> (WT) or RBPJ<sup>fl/fl</sup>-Cre<sup>+</sup> (KO) mice following pI:pC treatment. The frequency of T cell progenitors was determined by flow cytometry analysis. The frequency of c-Kit bright DN2a cells was dramatically reduced in RBPJ-KO thymus compared to that of the WT mice. (C) NOTCH1 does not binds to KIT locus in CUTLL1 cells revealed by genome-wide ChIP-seq analysis.

**Figure S7.** C-Kit expression was decreased in DLL1-Fc cultures of *Prl2*<sup>-/-</sup> LMPPs despite of increased level of c-Kit mRNAs. (A) LMPPs were sorted from *Prl2*<sup>+/+</sup> and *Prl2*<sup>-/-</sup> BM cells and cultured with DLL1-Fc. Mean fluorescence intensity of c-Kit was measured at day 12. (B) LMPPs were sorted from *Prl2*<sup>+/+</sup> and *Prl2*<sup>-/-</sup> BM cells and cultured with DLL1-Fc. Cells were harvested at each time point and c-Kit mRNA levels were measured by quantitative real-time

PCR. C-Kit mRNA was increased in fresh *Pr12*<sup>-/-</sup> LMPPs compared to that of the *Pr12*<sup>+/+</sup> cells (\*\**P*<0.05, n=3). (C) Quantitative real-time PCR analysis of gene expression in sorted ETPs from *Pr12*<sup>+/+</sup> and *Pr12*<sup>-/-</sup> mice. Data shown are the mean values ± SD (\**P*<0.05, \*\**p*<0.01, n = 3). (D) Quantitative real-time PCR analysis of *Cebpa* expression in ETPs and LMPPs purified from *Pr12*<sup>+/+</sup> and *Pr12*<sup>-/-</sup> mice. Data shown are the mean values ± SD (\**P*<0.05, n = 3).

**Figure S8.** (A) Representative flow cytometry plots for apoptosis assays of T-cell progenitors in OP9-DL1 cultures. *Pr12*<sup>-/-</sup> ETPs showed enhanced apoptosis compared to *Pr12*<sup>+/+</sup> cells. The frequency of DN1 cells was significantly reduced in *Pr12*<sup>-/-</sup> LMPPs cultures compared to that of the *Pr12*<sup>+/+</sup> LMPPs. (B) LMPPs were sorted from *Pr12*<sup>+/+</sup> and *Pr12*<sup>-/-</sup> BM cells and cultured with DLL1-Fc. The survival of different T cell population was measured by Annexin V and PI staining. Only *Pr12*<sup>-/-</sup> ETPs showed decreased survival compared to *Pr12*<sup>+/+</sup> ETPs (\*\**P*<0.01, n=3).

**Supplementary Table 1 – 3** List for definition of each population used (Table 1), antibodies (Table 2), and primers (Table 3) are shown.

Figure S1

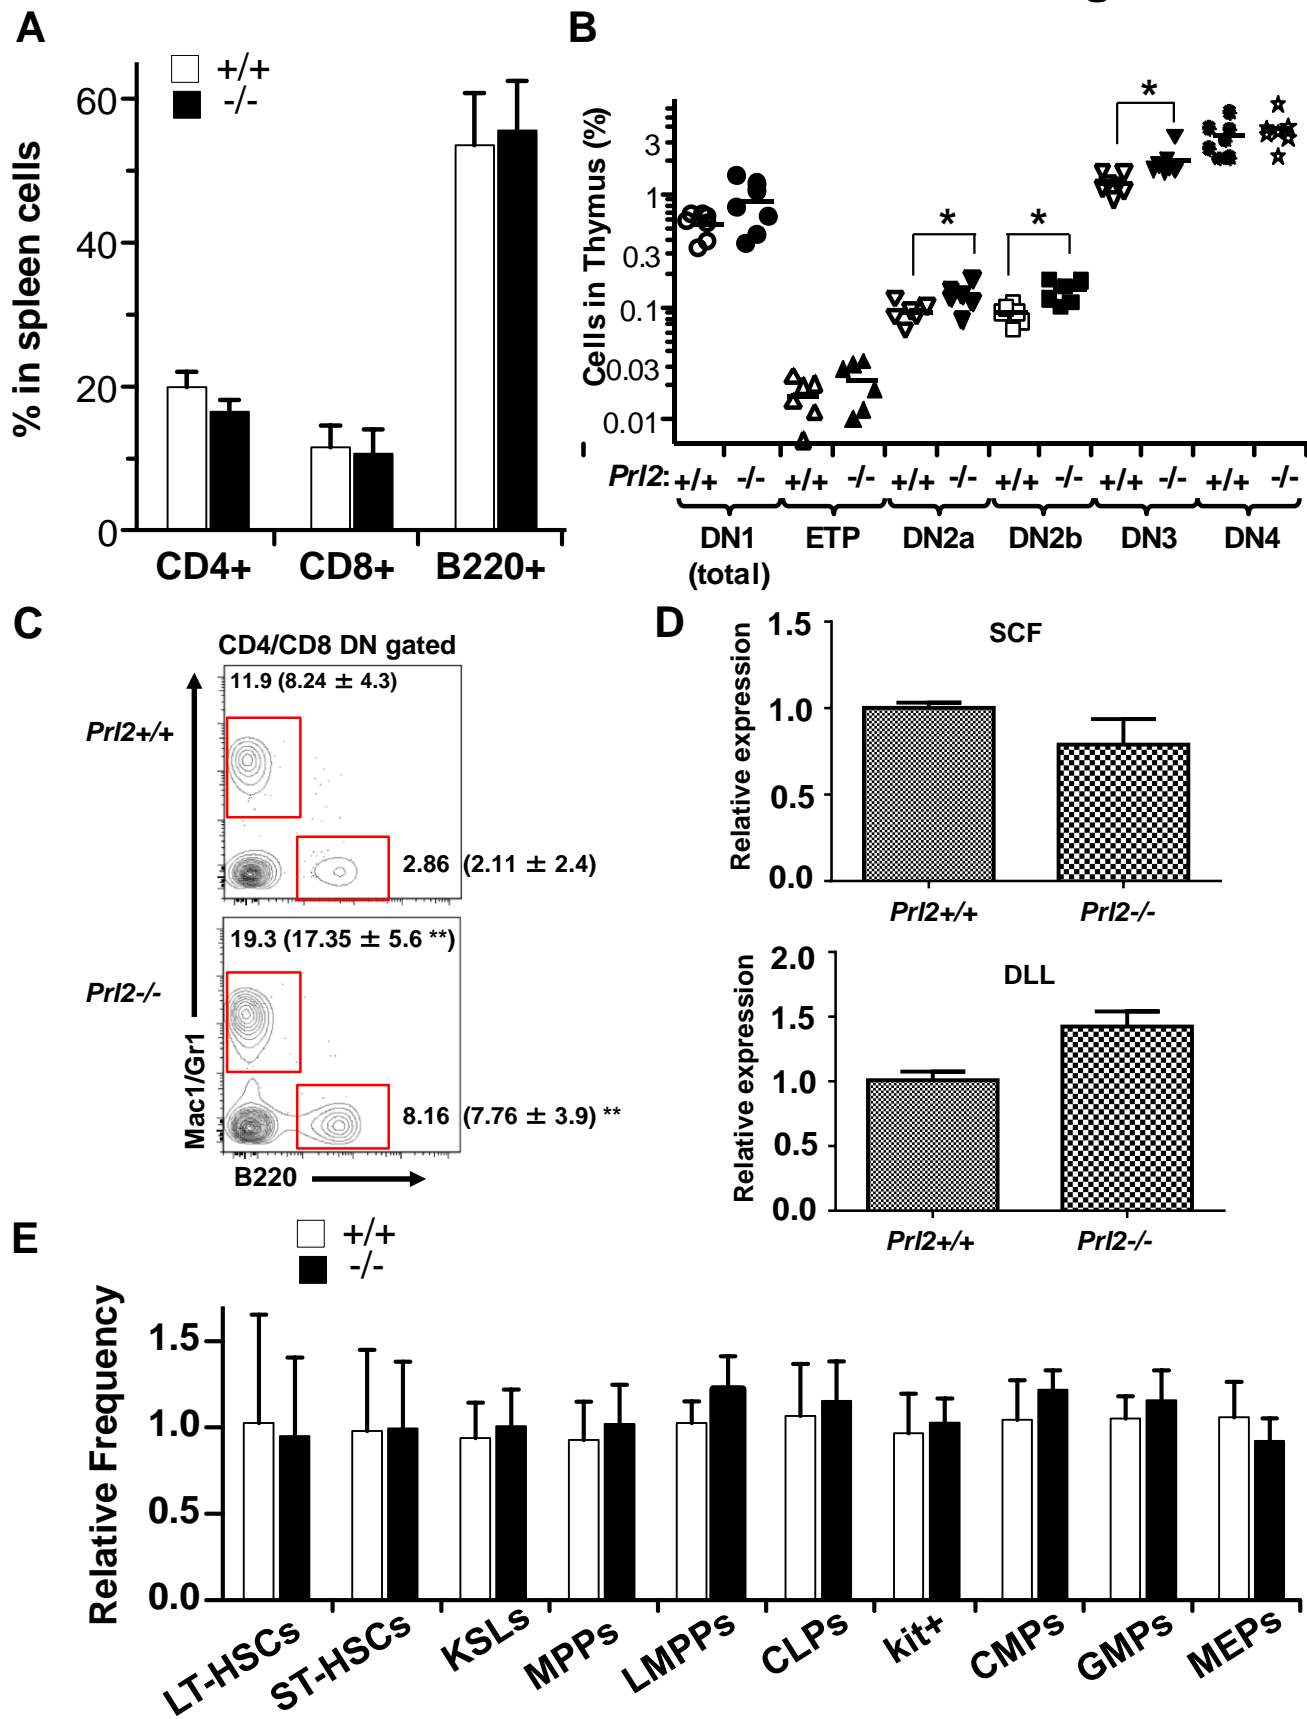

A

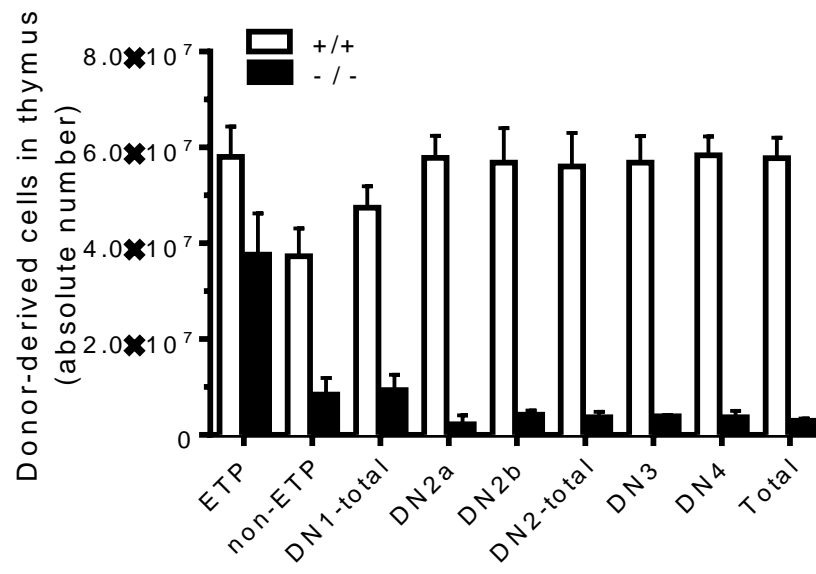

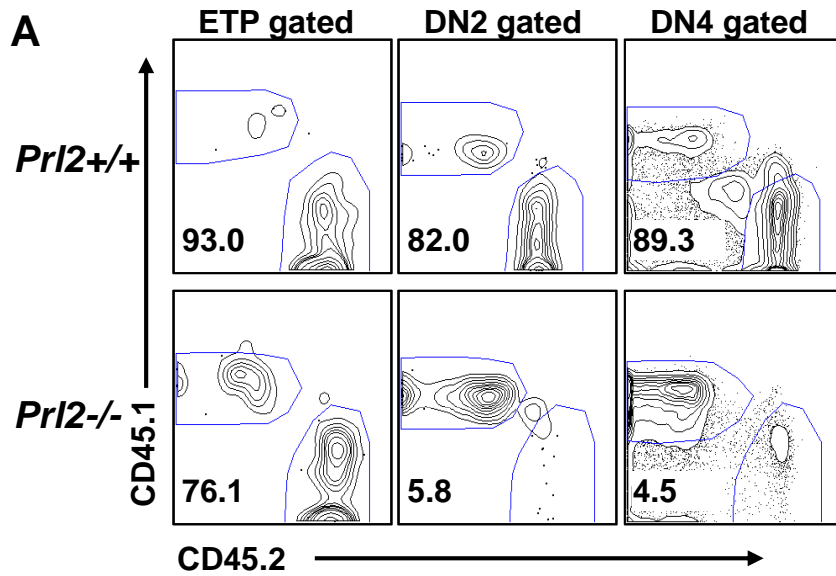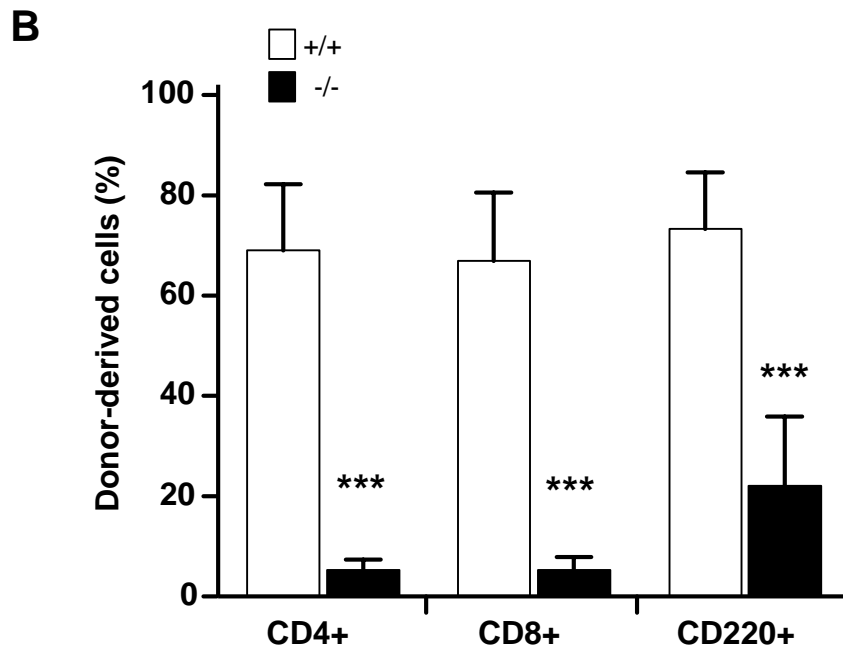



Figure S4

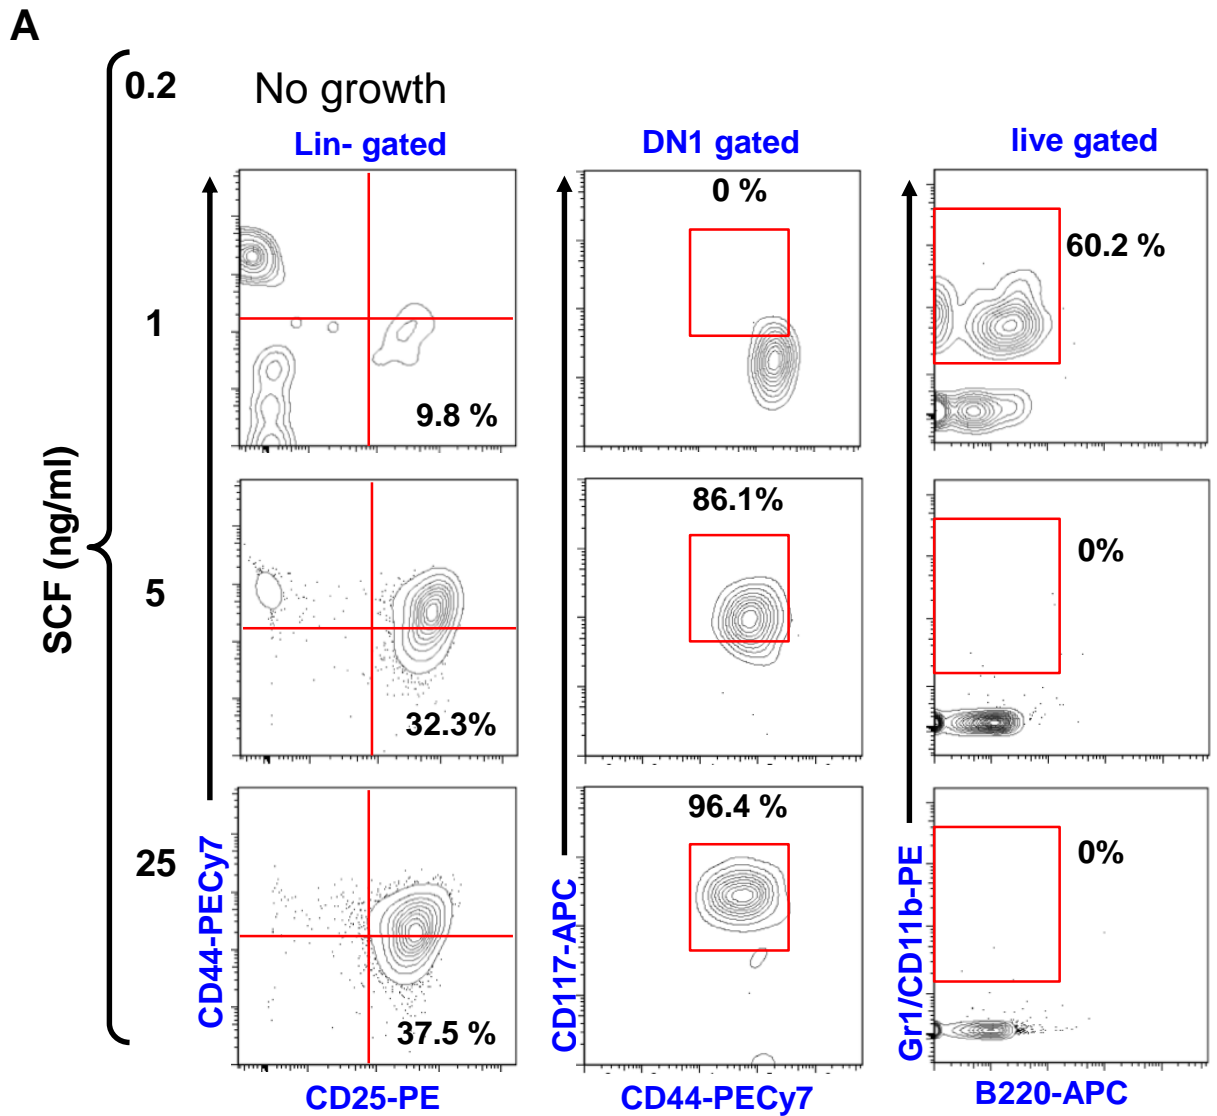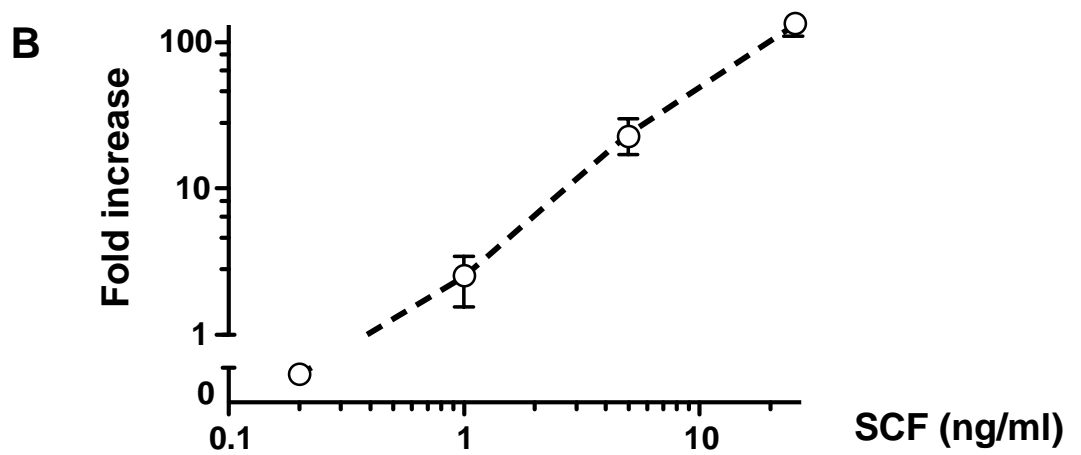

A

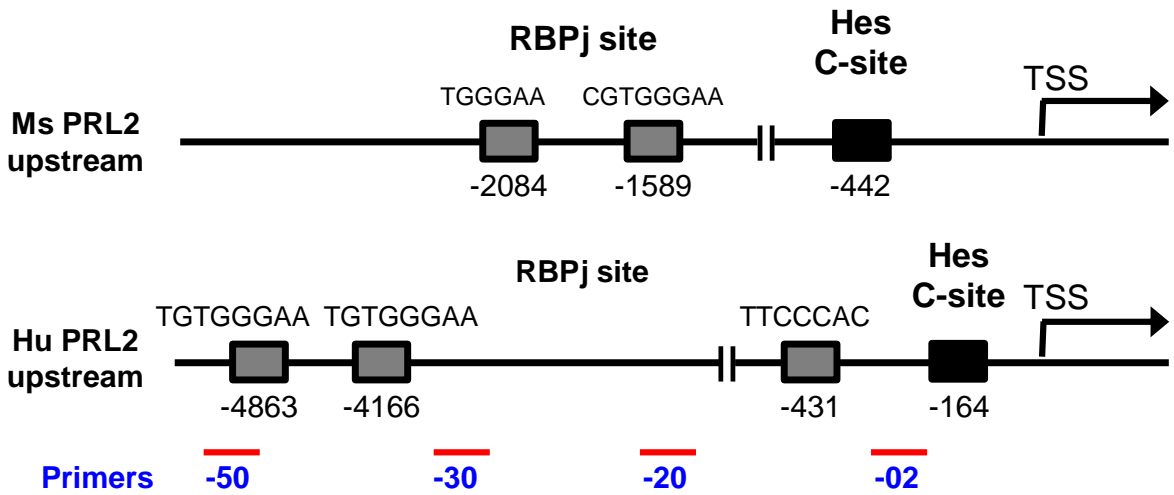

B

ChIP-seq in CUTLL1 cells

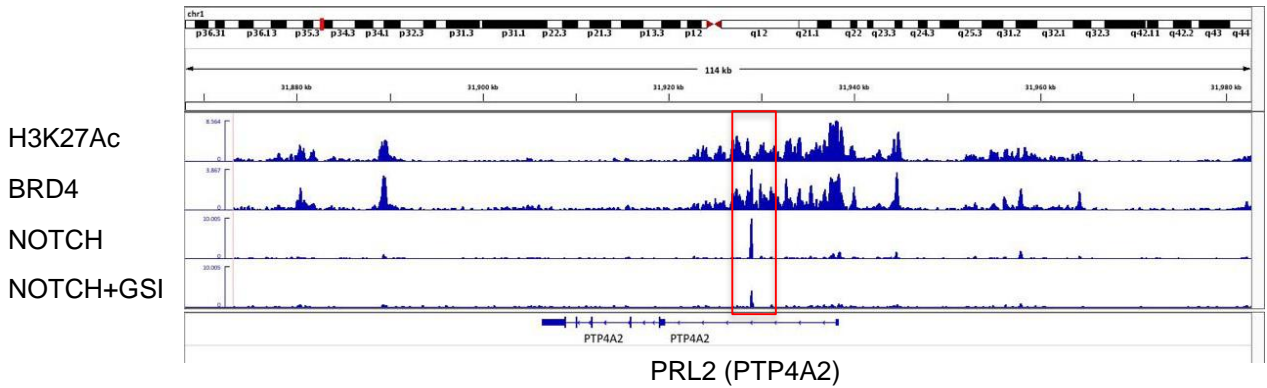

C

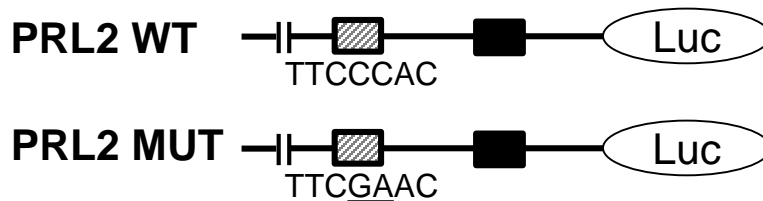

A

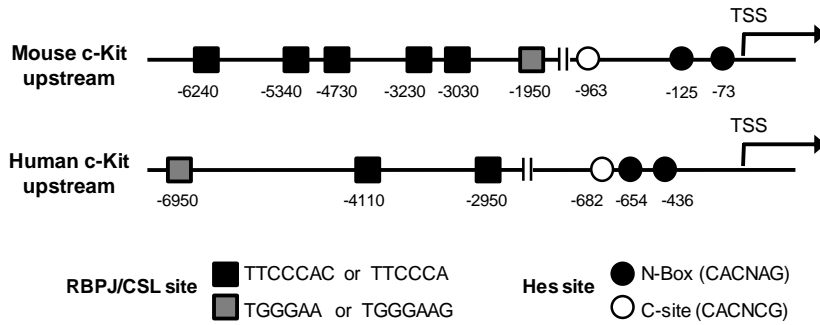

B

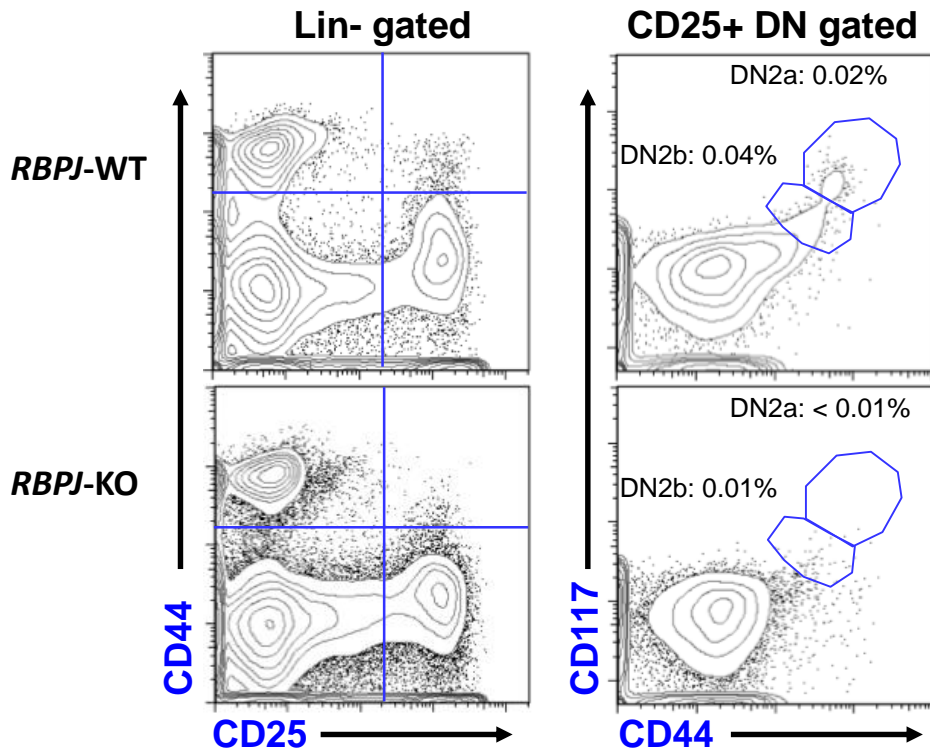

C

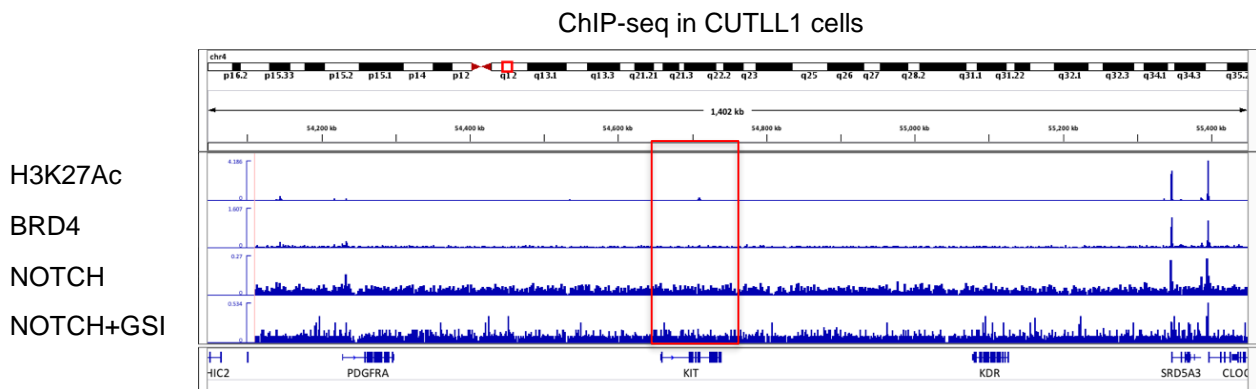

Figure S7

A

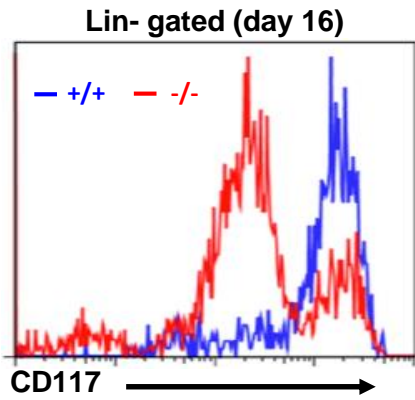

B

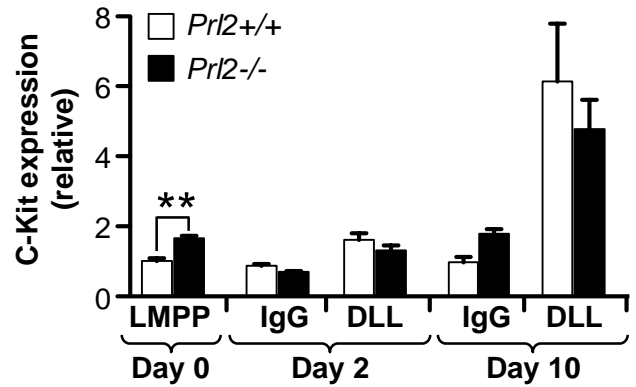

C

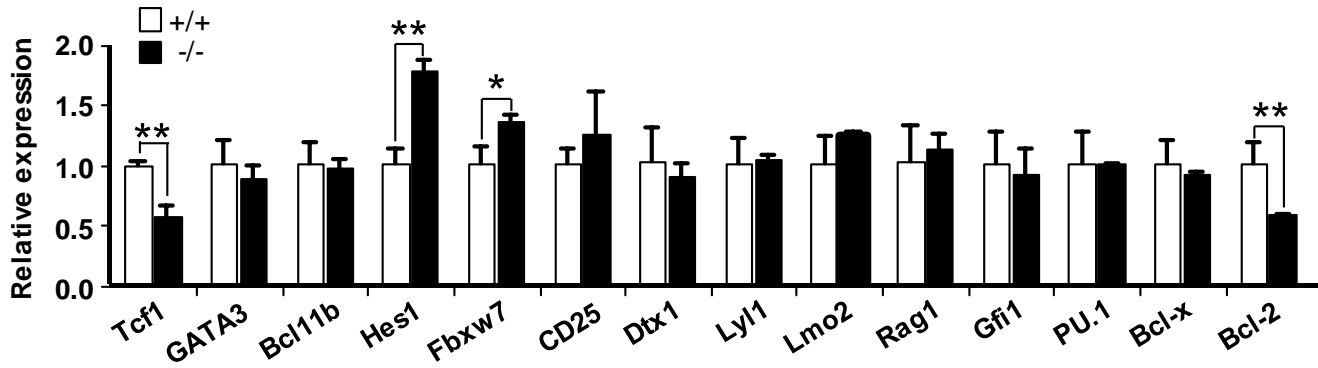

D

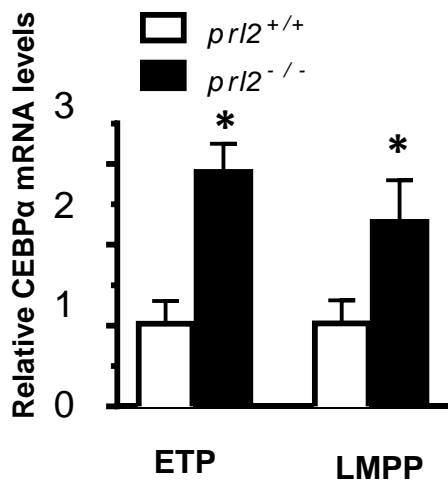

A

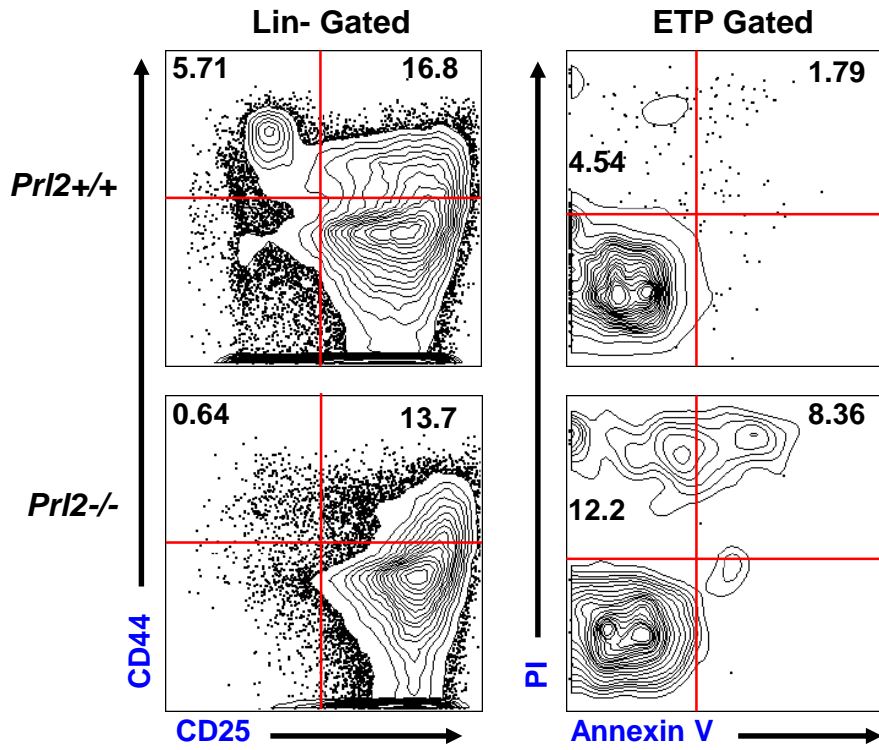

B

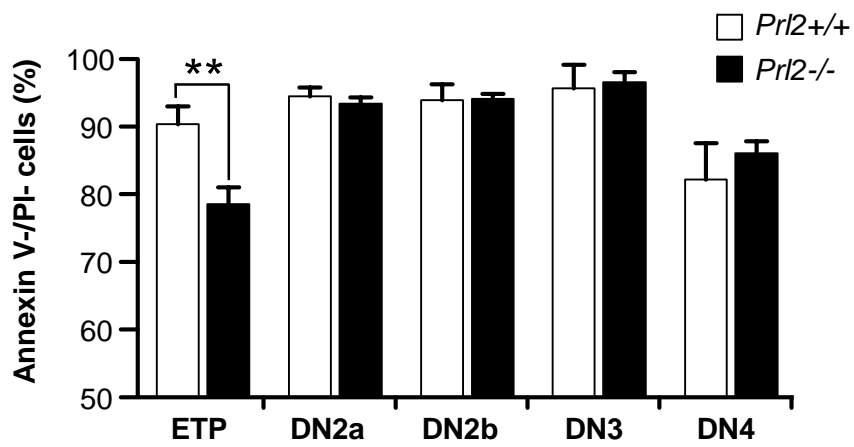

# Supplementary Table 1

## Definition of population

|         |                                                                    |
|---------|--------------------------------------------------------------------|
| LT-HSCs | CD34-/CD135-/Sca-1+/CD117+/Lin-<br>CD150+/CD48-/Sca-1+/CD117+/Lin- |
| ST-HSCs | CD34+/CD135-/Sca-1+/CD117+/Lin-                                    |
| MPPs    | CD150-/CD48+/Sca-1+/CD117+/Lin-                                    |
| LMPPs   | CD34+/CD135+/Sca-1+/CD117+/Lin-                                    |
| CLPs    | CD127+/Sca1+(dim)/CD117+(dim)/Lin-                                 |
| CMPs    | CD34+/CD16_32w-/Sca-1-/CD117+/Lin-                                 |
| GMPs    | CD34+/CD16_32w+/Sca-1-/CD117+/Lin-                                 |
| MEPs    | CD34-/CD16_32w-/Sca-1-/CD117+/Lin-                                 |
| Lin     | CD3e,Gr1,CD11b,Ter-119,B220                                        |
| TSPs    | CD135+/CD117+/CD127-/CD44+/CD25-/Lin-                              |
| ETPs    | CD117+/CD127-/CD44+/CD25-/Lin-                                     |
| DN2a    | CD117+(bright)/CD44+/CD25+/Lin-                                    |
| DN2b    | CD117+(dim)/CD44+/CD25+/Lin-                                       |
| DN3     | CD117-/CD44-/CD25+/Lin-                                            |
| DN4     | CD117-/CD44-/CD25-/Lin-                                            |
| Lin     | CD4,CD8a,TCR-b,NK1.1,Gr1,CD11b,Ter-119,B220                        |

## Supplementary Table 2

### Antibody List

| Antibody                 | Clone        | Supplier       | Conjugation                           |
|--------------------------|--------------|----------------|---------------------------------------|
| CD3ε                     | 145-2C11     | Biologend      | FITC, PE, PE-Cy7, Biotin              |
| CD4                      | RM4-5        | eBioscience    | FITC, PE, Biotin                      |
| CD8α                     | 53-6.7       | eBioscience    | APC, Biotin                           |
| Mac-1 (CD11b)            | M1/70        | Biologend      | FITC, PE, APC, Biotin                 |
| FcγRII/III<br>(CD16/32w) | 93           | Biologend      | PE-Cy7                                |
| CD34                     | RAM34        | BD bioscience  | FITC                                  |
| CD45.1 (Ly5.1)           | A20          | BD bioscience  | PE, PE-Cy7, APC-Cy7                   |
| CD45.2 (Ly5.2)           | 104          | BD bioscience  | FITC, PerCP-Cy5.5, APC                |
| CD48                     | HM48-1       | eBioscience    | FITC, PE, APC                         |
| CD150                    | TC15-12F12.2 | Biologend      | PE, PerCP-Cy5.5, APC                  |
| B220 (CD45R)             | RA3-6B2      | Biologend      | FITC, PE, PE-Cy7, APC, Biotin         |
| c-Kit (CD117)            | 2B8          | BD bioscience  | FITC, PE, APC, PE-Cy7, APC-Cy7        |
| Sca-1 (Ly-6A/E)          | D7           | BD bioscience  | PE, PerCP-Cy5.5, PE-Cy7, Pacific Blue |
| Ter119                   | Ter119       | Biologend      | FITC, PE, Biotin                      |
| Gr1                      | RB6-8C5      | Biologend      | FITC, PE, APC, Biotin                 |
| Ki-67                    | B56          | BD bioscience  | PE                                    |
| Streptavidin             |              | Biologend      | APC-Cy7                               |
| Annexin-V                |              | BD bioscience  | FITC                                  |
| CD25                     | PC61.5       | BioLegend      | FITC, PE, APC                         |
| CD44                     | IM7          | BioLegend      | PerCP-Cy5.5, PE-Cy7                   |
| TCR-b                    | H57-597      | BioLegend      | FITC, PE                              |
| TCR-gd                   | GL-3         | eBioscience    | APC                                   |
| NK1.1                    | PK136        | BD bioscience  | FITC, PE                              |
| FcE-R                    | MAR-1        | Biologend      | PE, APC                               |
| CD135                    | A2F10        | eBioscience    | PE                                    |
| CD127                    | A7R34        | Biologend      | PE, APC                               |
| c-Kit (human)            | 104D2        | BioLegend      | APC                                   |
| c-KitY703                | D13A2        | Cell Signaling |                                       |
| Actin                    |              | Cell Signaling |                                       |

# Supplementary Table 3

## Primer & oligonucleotide List

### qPCR primer

|        |                          |                          |
|--------|--------------------------|--------------------------|
| PRL2   | GGCTGTAACAGGGTGAAGA      | GCCACCAACATCTGGGTACT     |
| c-Kit  | GTGCCAACCAAGACAGACAAGA   | GCCAGCTCGTCATCTTCCATG    |
| Tcf1   | GGAGATGAGAGCCAAGGTCA     | TGCGGGCCAGTTCATAGTA      |
| GATA3  | GAAGGCAGGGAGTGTGTGAAC    | CTTGATAAGGGGCCGTTCTG     |
| Bcl11b | CTACTGTCACCCACGAAAGGC    | TGGGAAGAGGAGGCAGCTATG    |
| Lmo2   | ACGGAAATTGTGCAGGAGAG     | CTTTGTCTTTCACCCGCATC     |
| Hes1   | GAGTGCATGAACGAGGTGACC    | GGGTAGGTCATGGCGTTGATC    |
| Dtx1   | GGTGGCCATGTACTIONCAATGG  | GTCTGGGTGTCTGCAAAACCA    |
| Fbxw7  | AGTGATAGAGCCCCAGTTCCA    | TCCTCAGCCAAAATTCTCCA     |
| CD25   | CGTGGAAAGGACAGAGTGTTCA   | GCCAGAAATCGGTGGTGTCT     |
| Rag1   | CCCACAAATCAAATTTTCCGAGTG | CTTCTCTGGACTIONTGGAGACTG |
| Lck    | CAAGATCTCGCTGCCCATCC     | TAACTGTGCAGGGCGATAACC    |
| Lyl-1  | GCAGAAGCGCAGACCAAG       | CACACGGCTGTTGGTGAA       |
| Bcl-2  | TGAGTACCTGAACCGGCATCT    | TCAAACAGAGGTCGCATGCTG    |
| Bcl-X  | TGCAGGTATTGGTGAGTCGGA    | TGCTGCATTGTTCCCGTAGAG    |
| Ebf1   | CTATGTGCGCCTCATCGACTC    | ACTCGGCACATTTAGGGTTC     |
| PU.1   | GGATCTGACCAACCTGGAG      | CTACTACTCCTTCGTGGGCAG    |
| Gfi1   | GCTCCCGAATTTCCAGCCTC     | TGTTTGGACCCTCGGATACTC    |
| HPRT   | TCCTCCTCAGACCGCTTTT      | CCTGGTTCATCATCGCTAATC    |
| ActB   | CCTAAGGCCAACCGTGAAAAG    | CAGAGGCATACAGGGACAGCA    |

### ChIP primer

|                   |                        |                         |
|-------------------|------------------------|-------------------------|
| huPRL2/ChIP/-200  | AGGCCACGTTCTGCCTTC     | CTCCTCCTCCTCGTGGTTC     |
| huPRL2/ChIP/-400  | CAGTTCTTAGGGTGGGTGTGTG | TGGGGATTTCCACTIONCAGAAG |
| huPRL2/ChIP/-1000 | AATCTGCGTCGTTAAAGGTGA  | ACCTGGGCGACAGAGTGAGA    |
| huPRL2/ChIP/-2000 | GGGAAGGGTCATTCACCTTGG  | TGTTTTCAGATTCTCCCCTGCT  |
| huPRL2/ChIP/-3000 | CCGCCTTCTGGGTTCAAGT    | TAGCCGAGAGTGGTGGTAGG    |
| huPRL2/ChIP/-4000 | CAGGGCACTTATGCGTGAAAC  | CTCTCACCCCGACATCCAA     |
| huPRL2/ChIP/-5000 | TCCCAAGTCTACATGACAACA  | TGAAGCCCTCAGAAAAGTGG    |
